# Supplementary material for: Prospective stratification of patients at risk for emergency department revisit: resource utilization and population management strategy implications
Source: BMC Emerg Med. 2016 Feb 3;16:10. doi: 10.1186/s12873-016-0074-5 (PMC4739399; doi:10.1186/s12873-016-0074-5)
Supplement: Additional file 2: — EMR feature used to develop the model. A table lists the categories of features used to develop the final risk model. (PDF 87 kb) [file 12873_2016_74_MOESM2_ESM.pdf]

EMR feature used to develop the model.

| Feature group             | Feature number | Feature description (12 month clinical history before ED discharge)                                                                                                                                                                                                |
|---------------------------|----------------|--------------------------------------------------------------------------------------------------------------------------------------------------------------------------------------------------------------------------------------------------------------------|
| Encounter history         | 104            | Visit counts of different encounter types (E/O/I/P/R) *<br>The accumulated length of hospitalized stay<br>Counts of historical chronic disease diagnoses<br>Counts of total and no redundant total radiographic and laboratory tests, and outpatient prescriptions |
| Demographics              | 12             | Female, male<br>Income, education, payer<br>Age group is defined by age at ED admission<br>(0, 1-5yr, 6-12yr, 13-18yr, 19-34yr, 35-49yr, 50-65yr, 65+yr)<br>**                                                                                                     |
| Facility                  | 12             | Different facilities                                                                                                                                                                                                                                               |
| Procedure                 | 2              | Counts for different primary procedure and secondary procedure                                                                                                                                                                                                     |
| Chronic disease condition | 1              | Counts for chronic disease diseases                                                                                                                                                                                                                                |
| Diagnosis                 | 10             | Counts for primary diagnosis and secondary diagnosis                                                                                                                                                                                                               |
| Laboratory test           | 2              | Counts for different laboratory test results                                                                                                                                                                                                                       |
| Outpatient prescriptions  | 9              | Counts for different outpatient prescriptions                                                                                                                                                                                                                      |

\* Encounter type descriptions: E-Emergency, O-Outpatient, I-Inpatient, P-Pre admission, R-Recurring admission, \*\*yr-year
