# Supplementary material for: Prospective stratification of patients at risk for emergency department revisit: resource utilization and population management strategy implications
Source: Springer Nature journal article supplement (doi:10.1186/s12873-016-0074-5), 2016-02-03
Supplement: MOESM3 [file 9737202]

## Patient Characteristics

| Characteristics                                                  | Retrospective<br>(Jan.1, 2012 – Dec.31, 2012) |                         | Prospective<br>(Jan.1.2013 – Jun.30, 2013) |                         |
|------------------------------------------------------------------|-----------------------------------------------|-------------------------|--------------------------------------------|-------------------------|
|                                                                  | Control                                       | Case                    | Control                                    | Case                    |
|                                                                  | N = 167132                                    | N = 126329              | N = 107070                                 | N = 86816               |
| Male, %                                                          | 48.02                                         | 45.54                   | 47.72                                      | 45.11                   |
| Age (year), %                                                    |                                               |                         |                                            |                         |
| ≤ 18                                                             | 20.97                                         | 14.83                   | 21.10                                      | 14.32                   |
| 19 - 65                                                          | 60.76                                         | 68.68                   | 60.78                                      | 69.10                   |
| ≥ 65                                                             | 18.27                                         | 16.49                   | 18.12                                      | 16.58                   |
| Insurance status, %                                              |                                               |                         |                                            |                         |
| Blue Cross                                                       | 2.12                                          | 1.04                    | 2.59                                       | 1.21                    |
| Medicaid/Medicare                                                | 8.45                                          | 12.07                   | 15.16                                      | 21.60                   |
| Commercial                                                       | 3.95                                          | 2.29                    | 6.30                                       | 3.75                    |
| Free Care/Self Pay                                               | 1.87                                          | 2.12                    | 3.28                                       | 3.59                    |
| Others/Unknown                                                   | 83.61                                         | 82.47                   | 72.67                                      | 69.85                   |
| Median family income estimate, median (IQR)                      | 58750<br>(49148, 66484)                       | 55108<br>(47644, 62090) | 58984<br>(47750, 68082)                    | 55108<br>(47644, 63440) |
| Education, median (IQR)                                          |                                               |                         |                                            |                         |
| Percent high school graduate or higher                           | 89.40<br>(84.40, 91.40)                       | 89.00<br>(86.00, 91.40) | 89.50<br>(86.40, 92.70)                    | 88.80<br>(86.00, 91.80) |
| Percent bachelor's degree or higher                              | 22.20<br>(16.90, 29.00)                       | 21.70<br>(15.00, 26.60) | 22.90<br>(16.20, 32.10)                    | 22.00<br>(14.60, 28.30) |
| Health service utilization in past 12 months before ED discharge |                                               |                         |                                            |                         |
| Percent encounters with outpatient visits                        | 34.79                                         | 32.61                   | 35.18                                      | 34.18                   |
| Percent encounters with ED visits                                | 21.59                                         | 30.31                   | 21.31                                      | 31.51                   |
| Percent encounters with inpatient visits                         | 5.29                                          | 8.61                    | 5.44                                       | 9.31                    |
| No. of medications, median (IQR)                                 | 0 (0,15)                                      | 6 (0,89)                | 2 (0,21)                                   | 9 (0,68)                |
| No. of lab tests, median (IQR)                                   | 0 (0,46)                                      | 23 (0,100)              | 0 (0,52)                                   | 33 (0,133)              |
| No. of radiology, median (IQR)                                   | 0 (0,1)                                       | 0 (0,2)                 | 0 (0,1)                                    | 0 (0,2)                 |
| Percent encounters with chronic diseases                         | 24.71                                         | 26.12                   | 25.25                                      | 28.05                   |
