# Supplementary material for: Prospective stratification of patients at risk for emergency department revisit: resource utilization and population management strategy implications
Source: Springer Nature journal article supplement (doi:10.1186/s12873-016-0074-5), 2016-02-03

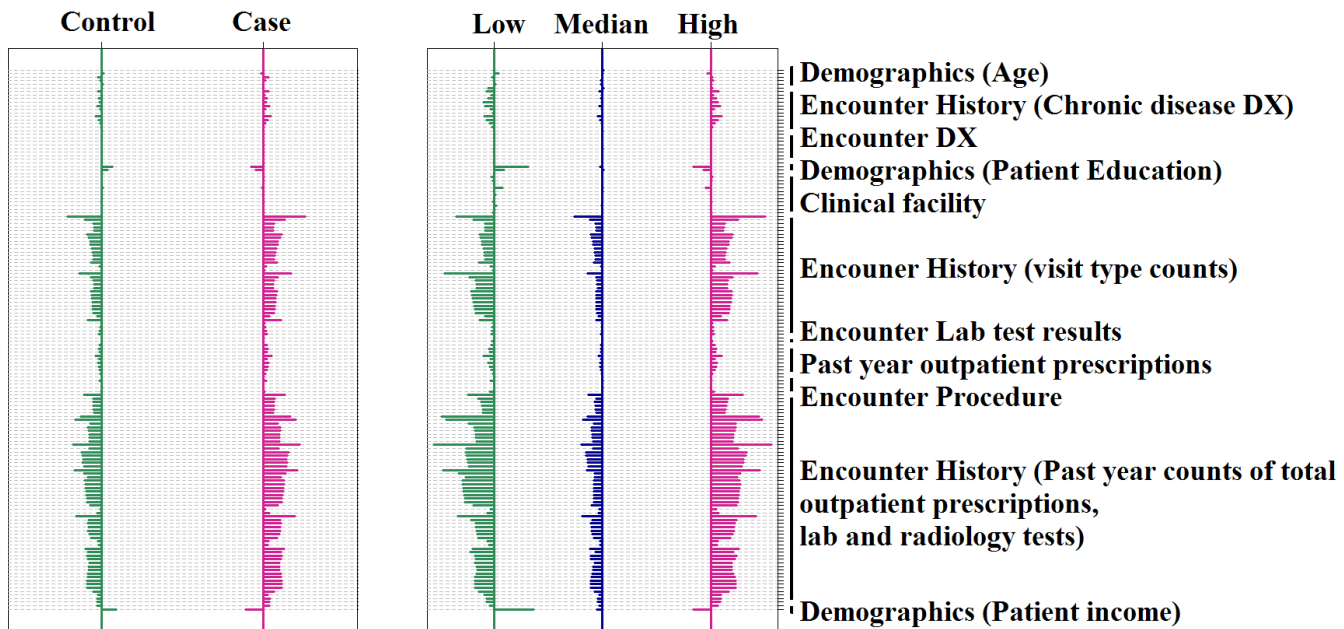

Supplement: MOESM6 [file 9737202]
