# Supplementary material for: Prospective stratification of patients at risk for emergency department revisit: resource utilization and population management strategy implications
Source: Springer Nature journal article supplement (doi:10.1186/s12873-016-0074-5), 2016-02-03
Supplement: MOESM7 [file 9737202]

### Unsupervised clustering procedure.

To reduce high dimensional EMR features for detecting cohort pattern, we used principle component analysis (PCA) to divide the high risk patients of 6-month ED return identified by our algorithm in the prospective cohort into distinctive groups, based on demographics, primary diagnosis and procedure, and chronic disease conditions. The features for high-risk patients are projected to a lower dimensional subspace with largest variances.

$$T_i^k = X_i \cdot w_k$$

Where  $X_i$  is EMR feature matrix for each high-risk patient, and  $w_k$  is the set of vectors of weights that map each patient feature vector  $X_i$  to a new vector of principal component scores  $T_i^k$ . And we computed  $w_1$  by solving following objective functions (1) and (2) and  $w_k$  by iterating objective function (3) based on the first k-1 principal components,

$$w_1 = \arg \max_{\|w\|=1} \left\{ \sum_i (T_i^1)^2 \right\} = \arg \max_{\|w\|=1} \left\{ \sum_i (X_i \cdot w)^2 \right\}$$

$$W_1 = \arg \max \left\{ \frac{w^T X^T X w}{w^T w} \right\}$$

$$w_k = \arg \max \left\{ \frac{w^T (X - \sum_{n=1}^{k-1} X w_n w_n^T)^T (X - \sum_{n=1}^{k-1} X w_n w_n^T) w}{w^T w} \right\}$$

And then K-means algorithm was applied on the top of principal components  $T_i^k$  subspace of PCA to find potential patient patterns for 6-month ED return [46]. We used  $K=6$  to implement initial k means set for the algorithm and calculate the Euclidean centroid  $m$  to generate final clusters,

$$m_i^{t+1} = \frac{1}{|C_i^t|} \sum_{x_j \in C_i^t} x_j$$

Where  $C_i$  is the  $i$ th cluster in total 6 clusters, and  $x$  represents the previous principal components  $T^k$ .

Unique patterns revealed by the clustering results were analyzed to characterize the high-risk subjects identified by our ED algorithm.
